# Supplementary material for: An overabundance of phase 0 introns immediately after the start codon in eukaryotic genes
Source: PubMed Central journal article supplement (PMC1626468; doi:10.1186/1471-2164-7-256), 2006-10-11
Supplement: 1471-2164-7-256-S1.pdf [file 1471-2164-7-256-S1.pdf]

# An overabundance of phase 0 introns immediately after the start codon in eukaryotic genes - *supplementary material*

Henrik Nielsen\* and Rasmus Wernersson

Center for Biological Sequence Analysis, Technical University of Denmark, Building 208, 2800 Lyngby, Denmark

Email: Henrik Nielsen\* - hnielsen@cbs.dtu.dk; Rasmus Wernersson - raz@cbs.dtu.dk;

\*Corresponding author

## Data sets

All data sets are available for download at: <http://www.cbs.dtu.dk/suppl/introns/>

## References

1. Pearson WR, Lipman DJ: **Improved tools for biological sequence comparison.** *Proc Natl Acad Sci U S A* 1988, **85**(8):2444–2448.
2. Thompson JD, Gibson TJ, Plewniak F, Jeanmougin F, Higgins DG: **The CLUSTAL\_X windows interface: flexible strategies for multiple sequence alignment aided by quality analysis tools.** *Nucleic Acids Research* 1997, **25**(24):4876–4882.
3. **Unrooted.** [<http://pbil.univ-lyon1.fr/software/unrooted.html>].

**Figure S1: intron length distribution for introns up to 250 nt**

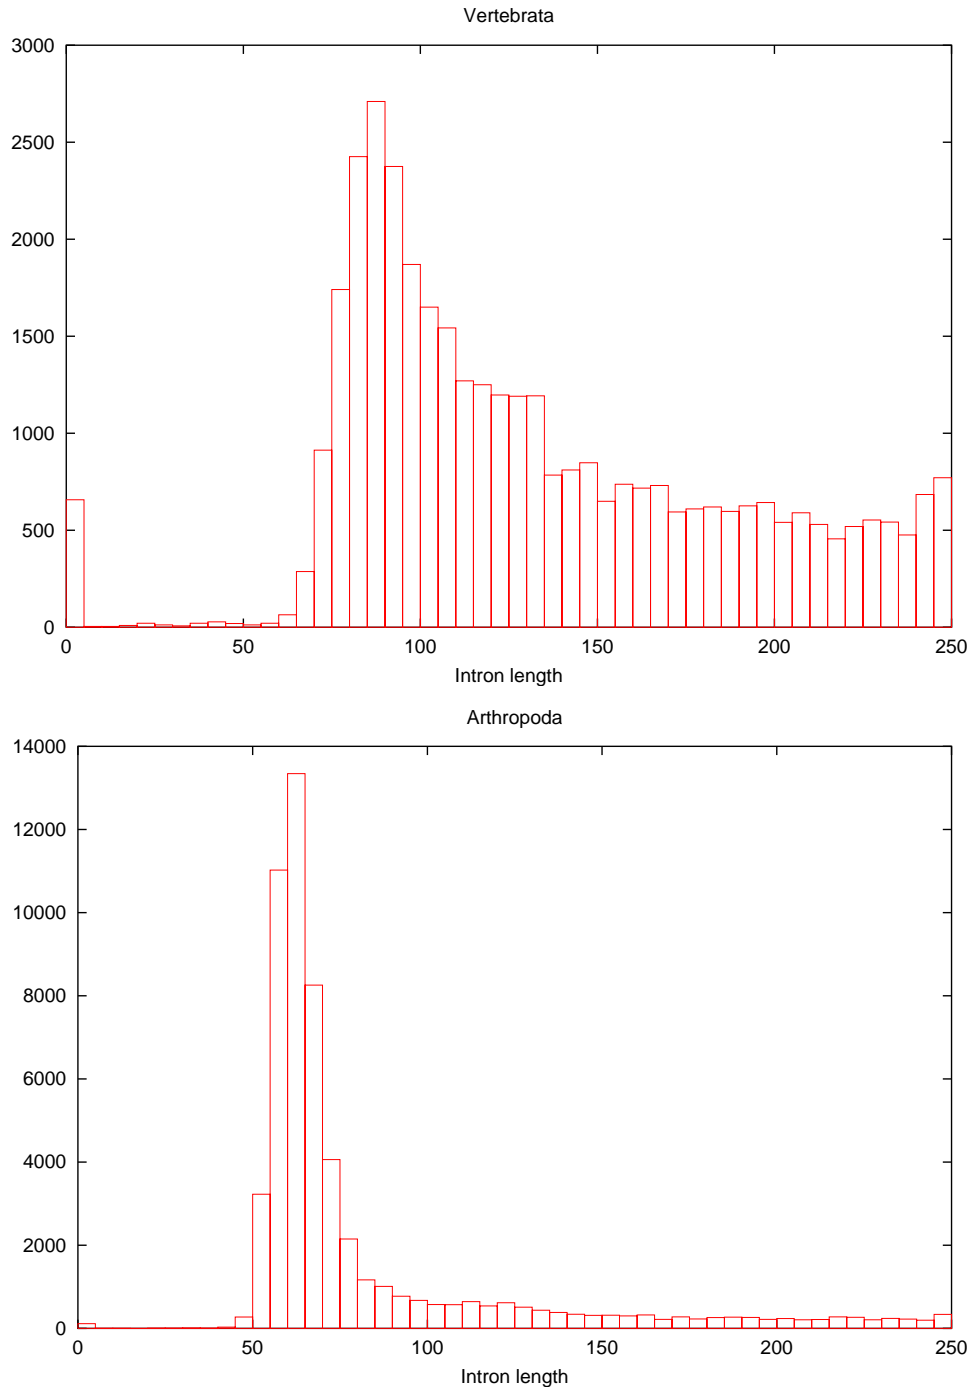

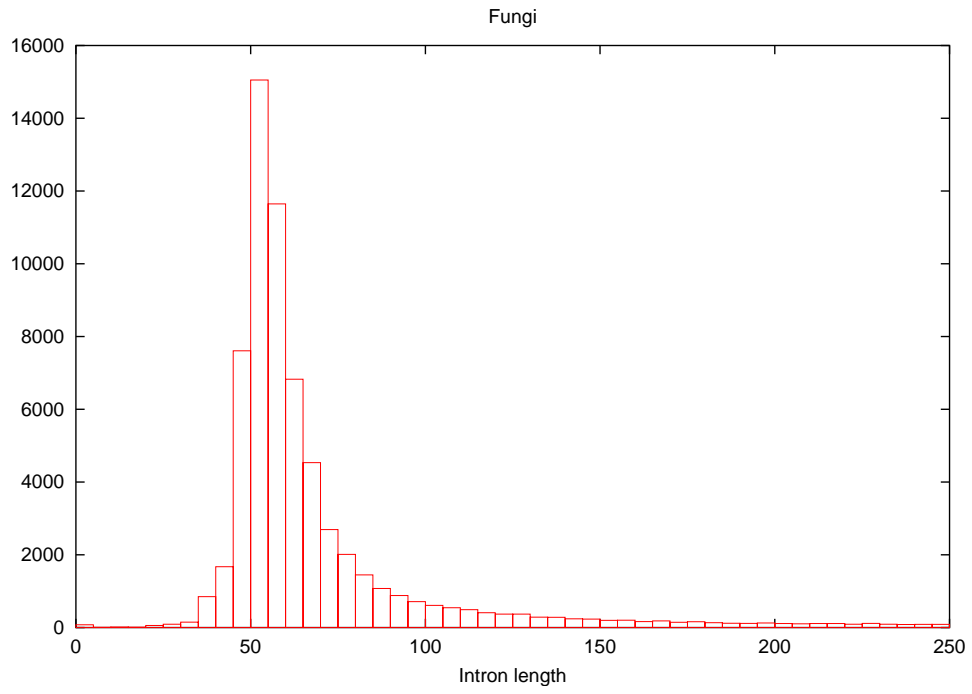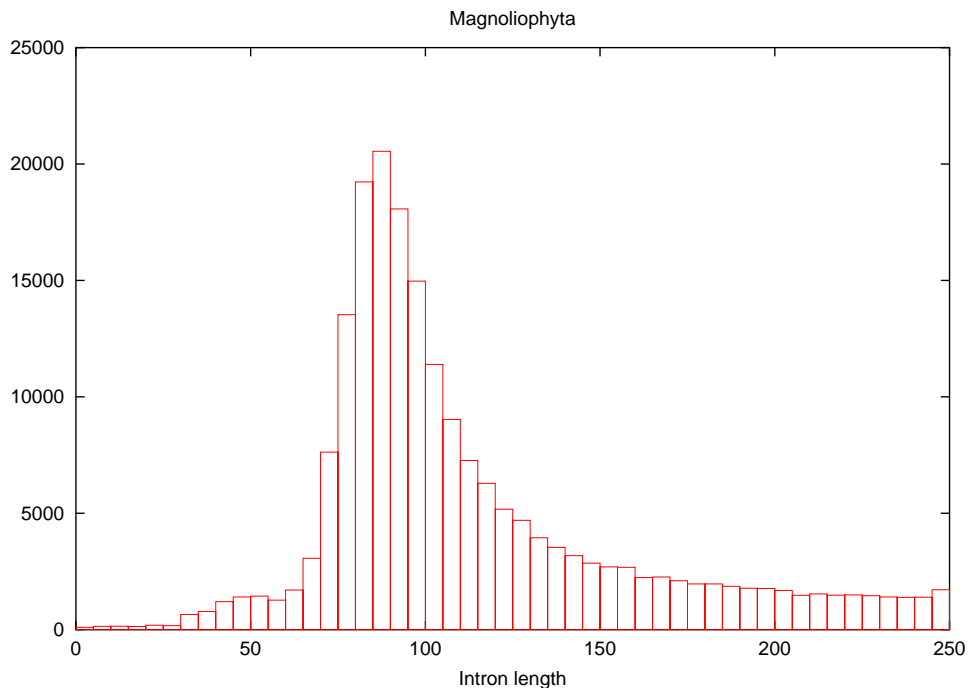

## **Figure S2: Intron position statistics for genome data without ribosomal proteins**

In order to show that the phenomenon of start codon introns is not limited to ribosomal proteins, we have calculated the distribution of intron positions for the whole-genome data sets (for proteins without signal peptides) with ribosomal proteins removed. This figure should be compared to the right half of Figure 3 in the paper.

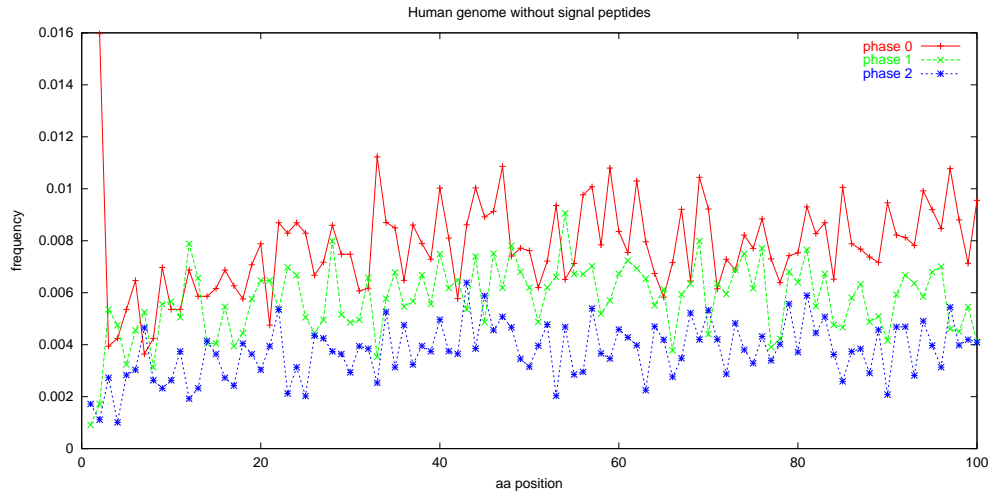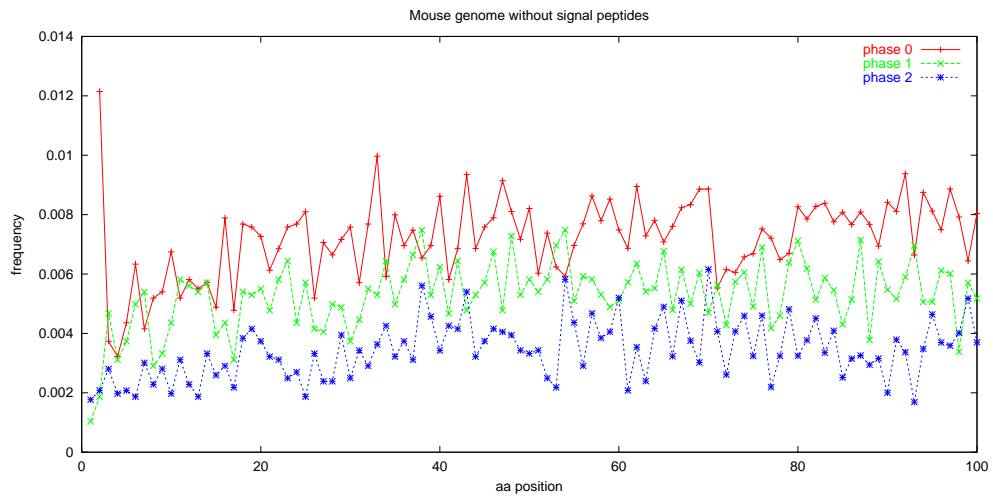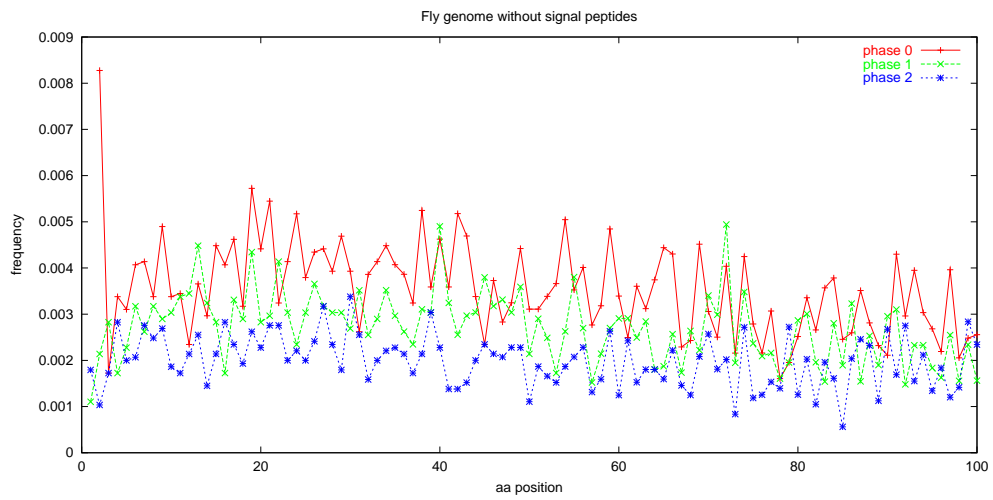

### Figure S3: Intron position statistics for human and Drosophila proteins with conserved N-terminals

In order to show that the start codon peak is also present in proteins with few indels in the N-terminal part, we selected from the list of RBHs (Reciprocal Best Hits) between human and Drosophila those global alignments where neither the human nor the fly sequence had gaps within the first 20 positions. This yielded 661 pairs, of which 582 human sequences and 599 fly sequences were predicted to be without signal peptides.

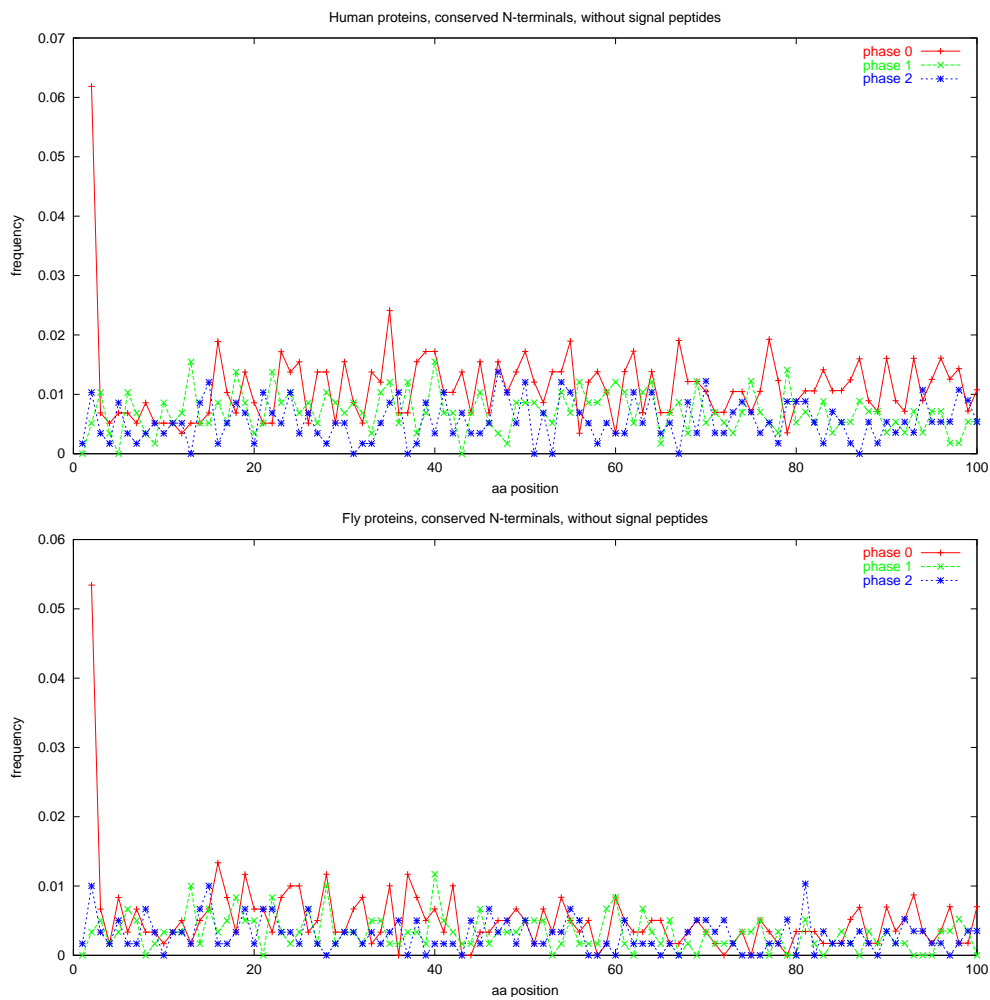

#### **Figure S4: All vs. all alignments: Score/Identity Plots and distance trees**

In order to make absolutely sure that the start codon and position 5 peaks, were not an artefact due to homologous proteins (even though the datasets have been homology reduced), we have analyzed the data the following way:

For each dataset, all protein sequences were aligned pairwise against the rest of the set using the ALIGN program [1], and alignment score and percent identity were plotted. Furthermore, we used CLUSTALW [2] to construct a "phylogenetic" tree based on pairwise distances (CLUSTALW's guide-tree), and visualized the relationship by plotting the tree with "UNROOTED" [3].

As seen in Section 1 & 2 below, the proteins in both the start codon peak and position 5 peak, are clearly not related. For reference we did the same analysis on 100 randomly selected proteins from the non-homology reduced Vertebrate set, and as seen in Section 3, it is clearly seen that a number of these sequences are related by homology.





### Fungi - start codon peak

All vs. all alignment (n=45)

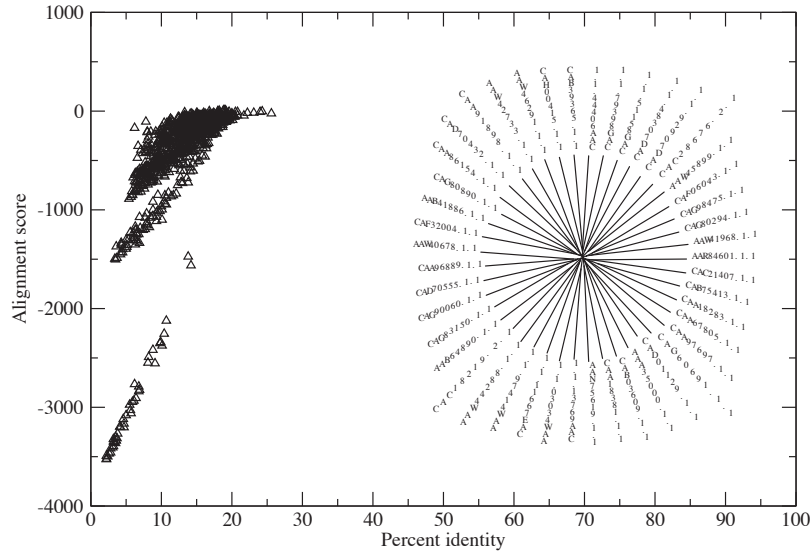

### Magnoliophyta start codon peak

All vs. all alignment (n=93)

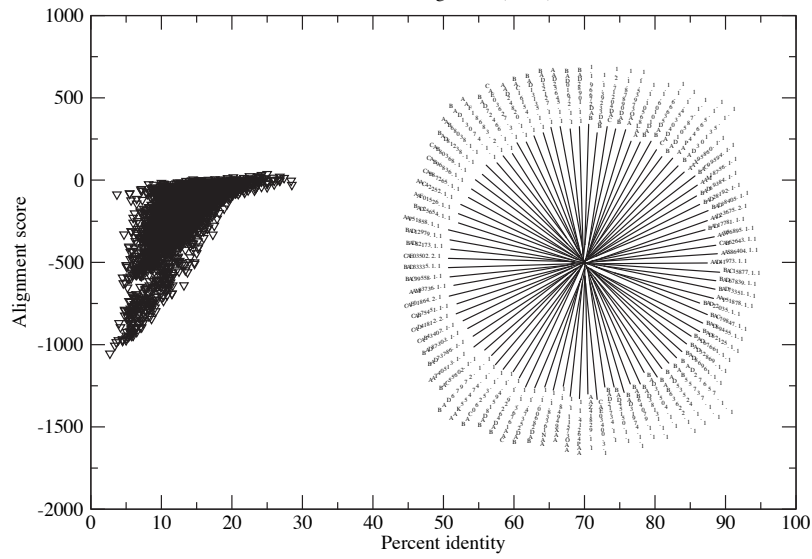

**Section 2: Arthropoda position 5 peak**

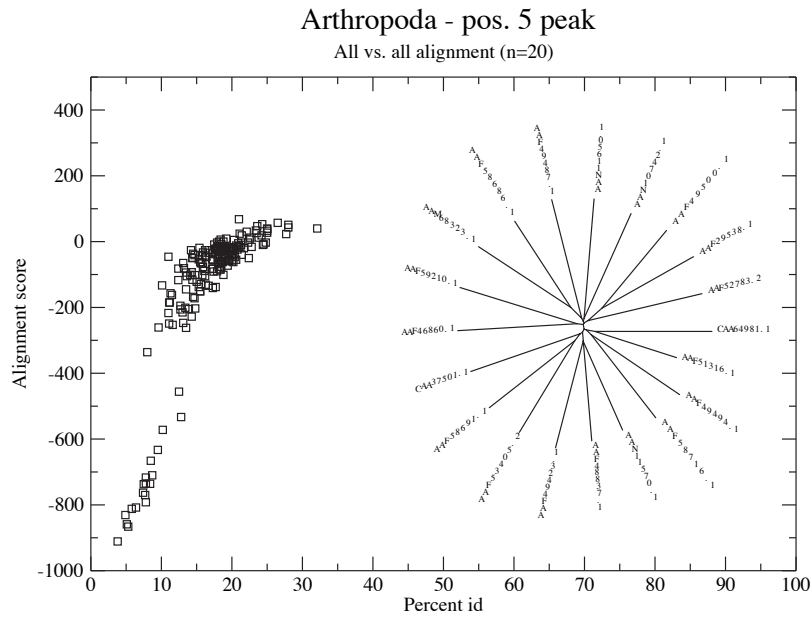

**Section 3: Reference plot of non-homology reduced data**

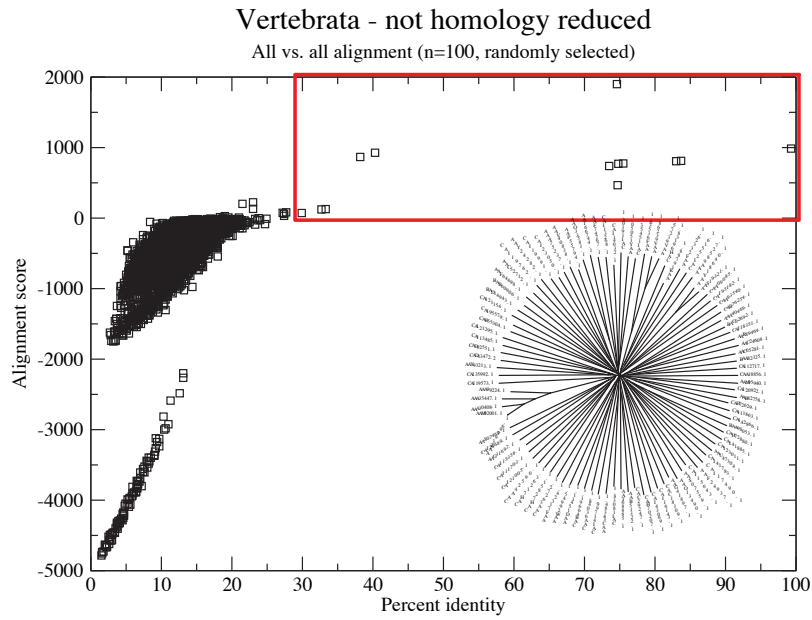

### **Table S1: lengths, nucleotide frequencies and dinucleotide frequencies for start codon introns compared to other first phase 0 introns**

Length and nucleotide statistics for start codon introns ("sci") and other phase 0 first introns ("other"). Where the difference for a particular dinucleotide is greater than 0.5%, the higher percentage is shown in boldface.

When examining the nucleotide distribution, significant differences are found for vertebrates, fungi, and plants ( $p < 10^{-4}$ ,  $\chi^2$ -test,  $df = 3$ ), but not for arthropods. However, when using nucleotide pair frequencies, significant differences are found for all four groups ( $p < 10^{-3}$ ,  $\chi^2$ -test,  $df = 15$ ). The nucleotide pair frequencies are shown in Table S1 (above). However, there does not seem to be any dinucleotide preferences that are the same in all four organism groups.

|                                | Vertebrata   |               | Arthropoda |        | Fungi        |              | Magnoliophyta |              |
|--------------------------------|--------------|---------------|------------|--------|--------------|--------------|---------------|--------------|
|                                | sci          | no sci        | sci        | no sci | sci          | no sci       | sci           | no sci       |
| <i>Length statistics</i>       |              |               |            |        |              |              |               |              |
| Mean                           | 3059.6       | 4941.3        | 631.0      | 822.4  | 170.0        | 106.6        | 498.6         | 478.8        |
| P-val                          | 0.01681      |               | 0.4927     |        | 0.008802     |              | 0.738         |              |
| <i>Nucleotide statistics</i>   |              |               |            |        |              |              |               |              |
| <b>a</b>                       | 26.20%       | 26.95%        | 29.27%     | 29.28% | 29.16%       | 26.72%       | 28.17%        | 27.98%       |
| <b>c</b>                       | 21.05%       | 20.75%        | 19.90%     | 20.27% | 19.93%       | 21.63%       | 19.94%        | 19.36%       |
| <b>g</b>                       | 23.48%       | 22.11%        | 19.84%     | 19.83% | 20.61%       | 21.30%       | 19.42%        | 20.29%       |
| <b>t</b>                       | 29.18%       | 30.18%        | 30.99%     | 30.63% | 30.31%       | 30.35%       | 32.46%        | 32.37%       |
| <i>Dinucleotide statistics</i> |              |               |            |        |              |              |               |              |
| <b>aa</b>                      | 7.85%        | 8.27%         | 11.01%     | 10.52% | <b>9.05%</b> | 7.65%        | 9.20%         | 8.91%        |
| <b>ac</b>                      | 4.59%        | 4.66%         | 4.74%      | 5.09%  | 5.58%        | 5.87%        | 4.84%         | 4.77%        |
| <b>ag</b>                      | 7.25%        | 7.09%         | 4.91%      | 5.08%  | 5.95%        | 5.82%        | 5.36%         | 5.48%        |
| <b>at</b>                      | 6.50%        | 6.93%         | 8.66%      | 8.62%  | <b>8.76%</b> | 7.64%        | 8.83%         | 8.88%        |
| <b>ca</b>                      | 6.59%        | 6.67%         | 6.50%      | 6.73%  | 6.44%        | 6.45%        | 5.98%         | 5.93%        |
| <b>cc</b>                      | 5.57%        | 5.52%         | 4.65%      | 4.50%  | 4.04%        | <b>4.89%</b> | 4.38%         | 4.25%        |
| <b>cg</b>                      | 1.69%        | 1.32%         | 3.64%      | 3.69%  | 3.26%        | 3.69%        | 3.14%         | 3.08%        |
| <b>ct</b>                      | 7.20%        | 7.25%         | 5.14%      | 5.36%  | 6.30%        | 6.80%        | 6.48%         | 6.14%        |
| <b>ga</b>                      | 5.95%        | 5.85%         | 4.99%      | 5.09%  | 6.34%        | 5.90%        | 5.43%         | 5.63%        |
| <b>gc</b>                      | 5.13%        | 4.68%         | 5.29%      | 5.19%  | 4.30%        | 4.39%        | 4.11%         | 4.23%        |
| <b>gg</b>                      | <b>6.64%</b> | 5.87%         | 3.91%      | 4.11%  | 3.99%        | 3.88%        | 4.11%         | 4.39%        |
| <b>gt</b>                      | 5.72%        | 5.69%         | 5.52%      | 5.34%  | 5.51%        | <b>6.38%</b> | 5.61%         | 5.86%        |
| <b>ta</b>                      | 5.79%        | 6.16%         | 6.82%      | 6.97%  | <b>7.50%</b> | 6.98%        | 7.62%         | 7.56%        |
| <b>tc</b>                      | 5.75%        | 5.90%         | 5.25%      | 5.51%  | 6.13%        | <b>6.68%</b> | 6.64%         | 6.15%        |
| <b>tg</b>                      | 7.87%        | 7.82%         | 7.25%      | 6.84%  | 6.94%        | 7.17%        | 6.66%         | <b>7.17%</b> |
| <b>tt</b>                      | 9.76%        | <b>10.31%</b> | 11.71%     | 11.34% | 9.92%        | 9.82%        | 11.60%        | 11.55%       |

**Table S2: Protein names or GO categories (for arthropoda) for all the start codon intron proteins**

**Vertebrata - GenBank dataset, homology reduced**

| Locus     | Protein Id | "Product" notes                                    |
|-----------|------------|----------------------------------------------------|
| AB020236  | BAA77361.1 | "ribosomal protein L27A"                           |
| AB040440  | BAB86591.1 | "glia maturation factor gamma"                     |
| AB061825  | BAB79463.1 | "ribosomal protein L18"                            |
| AB061834  | BAB79472.1 | "ribosomal protein L37"                            |
| AB061835  | BAB79473.1 | "ribosomal protein L39"                            |
| AB061842  | BAB79480.1 | "ribosomal protein S20"                            |
| AB061844  | BAB79482.1 | "ribosomal protein S25"                            |
| AB191468  | BAD52442.1 | "hypothetical protein"                             |
| AC004854  | AAS00365.1 | "unknown"                                          |
| AC016753  | AAY24341.1 | "unknown"                                          |
| AC020550  | AAX93146.1 | "unknown"                                          |
| AC073341  | AAQ96841.1 | "unknown"                                          |
| AC132479  | AAY24076.1 | "unknown"                                          |
| AF041427  | AAB96967.1 | "ribosomal protein s4 Y isoform"                   |
| AF082027  | AAC97929.1 | "alpha tubulin"                                    |
| AF100956  | AAC69898.1 | "ribosomal protein subunit S18"                    |
| AF229836  | AAK01854.1 | "vesicle-associated membrane protein 5"            |
| AF305057  | AAG29537.1 | "RTS beta"                                         |
| AL136181  | CAH72985.1 | "transmembrane protein 10"                         |
| AL137067  | CAC08000.1 | "Sec61 beta subunit"                               |
| AL139289  | CAI23381.1 |                                                    |
| AL157783  | CAI12146.1 | "cAMP responsive element modulator"                |
| AL354928  | CAI39640.1 | "ribosomal protein L35"                            |
| AL355815  | CAC19504.1 |                                                    |
| AL357314  | CAI22392.1 | "Rab geranylgeranyltransferase, beta subunit"      |
| AL359454  | CAI17157.1 | "chromosome 13 open reading frame 12"              |
| AL365338  | CAH70300.1 | "spermatid perinuclear RNA binding protein"        |
| AL451000  | CAH71470.1 | "novel protein (MDS2)"                             |
| AL512628  | CAI16468.1 | "ribosomal protein S24"                            |
| AL671762  | CAI18213.1 | "LSM2 homolog, U6 small nuclear RNA associate"     |
| AL844518  | CAE50610.1 | "novel protein similar to human and mouse"         |
| AL928906  | CAE49237.1 | "novel protein similar to human and mouse vacuola" |
| AL929220  | CAI21198.1 | "enhancer of rudimentary homolog (Drosophila)"     |
| CHKRIG    | BAA01036.1 | "ribosomal protein S15"                            |
| CHKRPL37A | BAA03209.1 | "ribosomal protein L37a"                           |
| CHKRPL5G  | BAA01581.1 | "ribosomal protein L5"                             |
| CIUEF2G   | AAA50386.1 | "elongation factor 2"                              |
| DQ118138  | AAZ38151.1 | "interferon-stimulated protein 17/ubiquitin"       |
| HS1054A22 | CAI19009.1 |                                                    |
| HS164F3   | CAI42360.1 | "ribosomal protein L36a"                           |
| HS333H23  | CAA18450.1 |                                                    |
| HS395P12  | CAA18438.2 | "tumor necrosis factor (ligand) superfamily"       |
| HS747E2   | CAB62958.1 |                                                    |
| HSA289880 | CAB96873.1 | "leucine zipper transcription factor-like 1"       |
| HSA462D18 | CAC10585.1 | "destrin (actin depolymerizing factor)"            |
| HSDJ636H5 | CAI22117.1 | "RAD54-like (S. cerevisiae)"                       |
| HSJ468K18 | CAI21442.1 | "chromosome 6 open reading frame 93"               |
| HSU29895  | AAC73008.1 | "4-hydroxyphenylpyruvate-dioxygenase"              |
| HSU41448  | AAC26987.1 | "ribosomal protein S26"                            |
| HUMMYLCA  | AAA59892.1 | "smooth muscle myosin light chain"                 |
| HUMPCBD   | AAA69662.1 | "pterin-4a-carbinolamine dehydratase"              |
| HUMRPS17A | AAA60285.1 |                                                    |
| MMU272272 | CAB95969.1 | "20S proteasome subunit C2"                        |
| RNMYOLC1  | CAA25480.1 | "MLC2"                                             |
| TRU310912 | CAC36099.1 | "putative ribosomal protein L14"                   |

## Arthropoda - GenBank dataset, homology reduced

| Locus     | Protein Id | "Product" notes                              | GO Term                                            |
|-----------|------------|----------------------------------------------|----------------------------------------------------|
| AE003422  | AAF45673.1 | "CG14813-PA"                                 | "[ISS]:retrograde transport, Golgi to ER"          |
| AE003427  | AAF45877.3 | "CG14271-PB"                                 | "[ISS]:sperm motility"                             |
| AE003435  | AAF46058.2 | "CG4111-PA, isoform A"                       | "[ISS]:cytosolic large ribosomal subunit"          |
| AE003456  | AAF46816.3 | "CG5625-PA, isoform A"                       | "[ISS]:vesicle-mediated transport"                 |
| AE003462  | AAF47154.1 | "CG3997-PA"                                  | "[ISS]:cytosolic large ribosomal subunit"          |
| AE003491  | AAN09651.1 | "CG1903-PA, isoform A"                       | "[IEA]:helicase activity"                          |
| AE003498  | AAF48422.2 | "CG15027-PA"                                 |                                                    |
| AE003498  | AAF48428.1 | "CG9091-PA"                                  | "[ISS]:cytosolic large ribosomal subunit"          |
| AE003500  | AAF48541.3 | "CG33180-PB"                                 | "[IEA]:protein transporter activity"               |
| AE003513  | AAF49011.1 | "CG14233-PA"                                 | "[IEP]:mesoderm development"                       |
| AE003519  | AAN11671.1 | "CG32027-PA"                                 | "[ND]:biological process unknown"                  |
| AE003529  | AAN11768.1 | "CG6151-PC, isoform C"                       |                                                    |
| AE003539  | AAF49847.1 | "CG11276-PA, isoform A"                      | "[ISS]:unfolded protein binding"                   |
| AE003539  | AAF49856.1 | "CG11267-PA"                                 | "[ISS]:cytosolic small ribosomal subunit"          |
| AE003541  | AAF49929.1 | "CG10418-PA"                                 | "[ISS]:nuclear mRNA splicing, via spliceosome"     |
| AE003542  | AAN12254.1 | "CG17146-PB, isoform B"                      | "[ISS]:uridine kinase activity"                    |
| AE003559  | AAF50596.1 | "CG8615-PA"                                  | "[ISS]:cytosolic large ribosomal subunit"          |
| AE003579  | AAF51096.2 | "CG33123-PA"                                 | "[ISS]:leucine-tRNA ligase activity"               |
| AE003585  | AAF51349.1 | "CG17158-PA"                                 | "[ISS]:F-actin capping protein complex"            |
| AE003608  | AAF52217.1 | "CG5827-PA, isoform A"                       | "[ISS]:cytosolic large ribosomal subunit"          |
| AE003619  | AAF52596.2 | "CG7424-PA"                                  | "[ISS]:cytosolic large ribosomal subunit"          |
| AE003628  | AAF52935.2 | "CG5362-PA"                                  | "[ISS]:L-malate dehydrogenase activity"            |
| AE003650  | AAF53517.2 | "CG5869-PA"                                  | "[ISS]:actin binding"                              |
| AE003659  | AAF53684.2 | "CG15162-PA"                                 |                                                    |
| AE003668  | AAF53924.1 | "CG9324-PA"                                  | "[NAS]:proteasome complex"                         |
| AE003677  | AAF54193.2 | "CG9667-PA"                                  |                                                    |
| AE003690  | AAF54605.2 | "CG6684-PB, isoform B"                       | "[ISS]:cytosolic small ribosomal subunit"          |
| AE003708  | AAN13658.2 | "CG5044-PB, isoform B"                       | "[ISS]:3-hydroxyisobutyryl-CoA hydrolase activity" |
| AE003710  | AAF55219.1 | "CG4525-PA"                                  |                                                    |
| AE003731  | AAG22163.1 | "CG4204-PA"                                  | "[ISS]:transcription elongation factor complex"    |
| AE003732  | AAF55809.1 | "CG15693-PA"                                 | "[ISS]:cytosolic small ribosomal subunit"          |
| AE003763  | AAG22173.1 | "CG5502-PA"                                  | "[ISS]:cytosolic large ribosomal subunit"          |
| AE003792  | AAM68401.1 | "CG8900-PB, isoform B"                       | "[ISS]:cytosolic small ribosomal subunit"          |
| AE003803  | AAF57861.1 | "CG10751-PA"                                 | "[ISS]:microtubule associated complex"             |
| AE003814  | AAF58229.1 | "CG10130-PA"                                 | "[ISS]:translocon complex"                         |
| AE003828  | AAF58742.1 | "CG7686-PA"                                  |                                                    |
| AE003831  | AAM71037.1 | "CG30010-PA"                                 | "[ND]:biological process unknown"                  |
| AF181084  | AAF16936.1 | "single-strand specific DNA-binding protein" |                                                    |
| DME271817 | CAB72251.1 | "ribosomal protein S17"                      |                                                    |
| DMH2AVDG  | CAA33555.1 | "histone H2A"                                |                                                    |
| DMU66357  | AAC47475.1 | "ribosomal protein RpL27a"                   |                                                    |
| DROMLCIC  | AAA28692.1 | "myosin alkali light chain"                  |                                                    |
| DSPTEH2   | CAB92783.1 | "nucleolar protein"                          |                                                    |
| DVI306692 | CAC41629.1 | "ribosomal protein L14"                      |                                                    |

## Fungi - GenBank dataset, homology reduced

| Locus     | Protein Id | "Product" notes                                   |
|-----------|------------|---------------------------------------------------|
| AE017341  | AAW40678.1 | "histone binding protein, putative"               |
| AE017342  | AAW41479.1 | "hypothetical protein"                            |
| AE017342  | AAW41968.1 | "expressed protein"                               |
| AE017343  | AAW42733.1 | "expressed protein"                               |
| AE017344  | AAW43030.1 | "adenosylhomocysteinase, putative"                |
| AE017346  | AAW44288.1 | "conserved hypothetical protein"                  |
| AE017350  | AAW45899.1 | "60s ribosomal protein l11, putative"             |
| AE017351  | AAW46291.1 | "hypothetical protein"                            |
| AF542530  | AAN75619.1 | "RPL22"                                           |
| AY426181  | AAR84601.1 | "Psa1p"                                           |
| BX649606  | CAF32004.1 | "60S ribosomal protein l5, putative"              |
| BX842641  | CAE76611.1 | "hypothetical protein"                            |
| BX908809  | CAF06043.1 | "putative protein"                                |
| CR380956  | CAG60691.1 |                                                   |
| CR382124  | CAH00415.1 |                                                   |
| CR382126  | CAG98475.1 |                                                   |
| CR382128  | CAG83150.1 |                                                   |
| CR382130  | CAG80890.1 |                                                   |
| CR382131  | CAG80294.1 |                                                   |
| CR382134  | CAG85115.1 |                                                   |
| CR382138  | CAG89397.1 |                                                   |
| CR382139  | CAG90060.1 |                                                   |
| NC12F11   | CAC18219.2 | "conserved hypothetical protein"                  |
| NC7F4     | CAD70929.9 | "related to secretory pathway protein YSY6"       |
| NC93G11   | CAC28676.2 | "related to calmodulin"                           |
| NCB17B1   | CAD70384.1 | "related to ubiquitin fusion degradation protein" |
| NCB19A17  | CAD70555.1 | "hypothetical protein"                            |
| NCB23B10  | CAD70432.1 | "hypothetical protein"                            |
| NCB208    | CAD01129.1 | "conserved hypothetical protein"                  |
| NCU84904  | AAB41886.1 | "V-type ATPase subunit G"                         |
| SC5610    | CAA86154.1 |                                                   |
| SCD9461   | AAB64890.1 | "Rp51bp: ribosomal protein RP51B"                 |
| SCUBC12   | CAA67805.1 | "ubiquitin-conjugating enzyme"                    |
| SCYGL030W | CAA96731.1 |                                                   |
| SCYGL178W | CAA96889.1 |                                                   |
| SCYLR128W | CAA97697.1 |                                                   |
| SPAC30D11 | CAA91898.1 |                                                   |
| SPAC6G9   | CAB03609.1 |                                                   |
| SPBC211   | CAB75413.1 |                                                   |
| SPBC29A3  | CAA18381.1 |                                                   |
| SPBC685   | CAB39365.1 |                                                   |
| SPBPB2B2  | CAC21407.1 |                                                   |
| SPCC364   | CAA18283.1 |                                                   |
| SPDNABRD1 | CAA60444.1 | "bromodomain protein"                             |
| YSCRPHOM  | AAA35000.1 | "ribosomal protein"                               |

## Magnoliophyta - GenBank dataset, homology reduced

| Locus    | Protein Id | "Product" notes                                 |
|----------|------------|-------------------------------------------------|
| AC005395 | AAC42252.1 | "hypothetical protein"                          |
| AC006438 | AAD41973.1 | "hypothetical protein"                          |
| AC006841 | AAD23675.2 | "putative ubiquitin fusion-degradation protein" |
| AC007109 | AAD25645.1 | "60S ribosomal protein L14"                     |
| AC007196 | AAD24820.1 | "putative snRNP splicing factor"                |
| AC068951 | AAM93736.1 | "hypothetical protein"                          |
| AC084295 | AAK55474.1 | "putative beta-glucosidase-aggregating factor"  |
| AC084765 | AAP46214.1 | "hypothetical protein"                          |
| AC091627 | AAT40513.1 | "hypothetical protein"                          |
| AC092262 | AAO37511.1 | "hypothetical protein"                          |
| AC092559 | AAD37935.1 | "putative actin-related complex protein"        |
| AC093713 | AAP44665.1 | "putative 40S ribosomal protein S15"            |
| AC093954 | AAS86404.1 | "hypothetical protein"                          |
| AC099040 | AAL86501.1 | "putative endonuclease"                         |
| AC099325 | AAM18756.1 | "hypothetical protein"                          |
| AC104615 | AAN16338.1 | "hypothetical protein"                          |
| AC133005 | AAX95860.1 | "hypothetical protein"                          |
| AC135497 | AAW94948.1 | "hypothetical protein"                          |
| AC152970 | AAW56895.1 | "cell death-related protein"                    |
| AC166741 | AAZ41829.1 | "80C09_18"                                      |
| AP000399 | BAD67661.1 | "hypothetical protein"                          |
| AP001366 | BAD81238.1 | "hypothetical protein"                          |
| AP002524 | BAD67839.1 | "hypothetical protein"                          |
| AP002864 | BAD67972.1 | "hypothetical protein"                          |
| AP003076 | BAD86961.1 | "hypothetical protein"                          |
| AP003103 | BAD81594.1 | "hypothetical protein"                          |
| AP003104 | BAB55737.1 | "hypothetical protein"                          |
| AP003207 | BAB64079.1 | "hypothetical protein"                          |
| AP003255 | BAD73351.1 | "hypothetical protein"                          |
| AP003263 | BAB63622.1 | "putative 40S ribosomal protein S10"            |
| AP003269 | BAD87303.1 | "hypothetical protein"                          |
| AP003316 | BAC06253.1 |                                                 |
| AP003338 | BAD45150.1 | "hypothetical protein"                          |
| AP003346 | BAD82125.1 | "hypothetical protein"                          |
| AP003349 | BAD82173.1 | "putative ribosomal protein L5"                 |
| AP003508 | BAD72466.1 | "hypothetical protein"                          |
| AP003575 | BAD53524.1 | "potential autophagy related protein-like"      |
| AP003617 | BAD32869.1 | "hypothetical protein"                          |
| AP003682 | BAD53666.1 | "hypothetical protein"                          |
| AP003737 | BAD30135.1 | "hypothetical protein"                          |
| AP003747 | BAC55602.1 | "unknown protein"                               |
| AP003802 | BAC15877.1 | "putative 60S ribosomal protein L44"            |
| AP003884 | BAD01672.1 | "60S ribosomal protein L7A"                     |
| AP004024 | BAD27657.1 | "hypothetical protein"                          |
| AP004030 | BAD27669.1 | "putative actin related protein 2/3 complex, 2" |

Continues on next page



| Locus                               | Protein Id | "Product" notes                                |
|-------------------------------------|------------|------------------------------------------------|
| <i>Continued from previous page</i> |            |                                                |
| AP004168                            | BAD21734.1 | "hypothetical protein"                         |
| AP004300                            | BAC79847.1 | "putative TGF(transforming growth factor) bet" |
| AP004366                            | BAD73786.1 | "putative vacuolar-type H(+)-ATPase"           |
| AP004560                            | BAC99558.1 | "hypothetical protein"                         |
| AP004650                            | BAC99594.1 | "hypothetical protein"                         |
| AP004695                            | BAD12979.1 | "hypothetical protein"                         |
| AP004702                            | BAD09878.1 | "hypothetical protein"                         |
| AP004772                            | BAD25374.1 | "hypothetical protein"                         |
| AP004811                            | BAD33293.1 | "hypothetical protein"                         |
| AP004872                            | BAD28192.1 | "hypothetical protein"                         |
| AP005003                            | BAD25654.1 | "hypothetical protein"                         |
| AP005092                            | BAD33335.1 | "hypothetical protein"                         |
| AP005148                            | BAD10106.1 | "hypothetical protein"                         |
| AP005191                            | BAD13074.1 | "hypothetical protein"                         |
| AP005244                            | BAC16154.1 | "transcription factor-like protein"            |
| AP005303                            | BAD22035.1 | "hypothetical protein"                         |
| AP005421                            | BAD28600.1 | "hypothetical protein"                         |
| AP005479                            | BAD31504.1 | "hypothetical protein"                         |
| AP005497                            | BAD38131.1 | "hypothetical protein"                         |
| AP005524                            | BAD13135.1 | "putative 40S ribosomal protein S25 (RPS25B)"  |
| AP005546                            | BAD46229.1 | "putative protein kinase"                      |
| AP005636                            | BAD28901.1 | "hypothetical protein"                         |
| AP005730                            | BAD10587.1 | "hypothetical protein"                         |
| AP005896                            | BAD38405.1 | "hypothetical protein"                         |
| AP006069                            | BAD17781.1 | "hypothetical protein"                         |
| AP006268                            | BAD31974.1 | "putative cytoplasmic ribosomal protein L18"   |
| AP006753                            | BAD32127.1 | "hypothetical protein"                         |
| AP006860                            | BAD69384.1 | "hypothetical protein"                         |
| AP008246                            | BAD89455.1 | "hypothetical protein"                         |
| ATAC009991                          | AAF01526.1 | "putative 60S ribosomal protein L37a"          |
| ATCHRIV86                           | CAB80368.1 | "putative protein"                             |
| ATF13C5                             | CAA16763.1 | "cadmium-induced protein"                      |
| ATF2206                             | CAB43407.1 | "putative ribosomal protein S14"               |
| ATF24M12                            | CAB62643.1 | "putative protein"                             |
| ATT16L24                            | CAB75451.1 | "60S RIBOSOMAL PROTEIN L38-like protein"       |
| ATT28J14                            | CAB87265.1 | "ribosomal protein S4"                         |
| ATT30N20                            | CAB96836.1 | "enhancer of rudimentary"                      |
| ATU78866                            | AAB68038.1 |                                                |
| OSJN00079                           | CAE03502.2 |                                                |
| OSJN00089                           | CAD41812.2 |                                                |
| OSJN00090                           | CAE03400.3 |                                                |
| OSJN00094                           | CAE03627.3 |                                                |
| OSJN00096                           | CAE01864.2 |                                                |
| OSJN00158                           | CAD40217.2 |                                                |
| OSJN00163                           | CAD40354.1 |                                                |
| U90439                              | AAF18683.2 | "putative guanylate kinase"                    |
